# Supplementary material for: Hydrogen production via steam reforming of methanol on Cu/ZnO/Al2O3 catalysts: the effect of TiO2 addition mode
Source: Royal Society of Chemistry journal article supplement (doi:10.1039/d3nj05133a), 2024-01-01
Supplement: d3nj05133a1.pdf [file d3nj05133a1.pdf]

## Supplementary materials

Hydrogen production via steam reforming of methanol on Cu/ZnO/Al<sub>2</sub>O<sub>3</sub> catalysts:

Effect of TiO<sub>2</sub> addition mode

*Min Huang<sup>a,b</sup>, Qifei Bo<sup>a</sup>, Juan Li<sup>a,b</sup>, Jingxuan Qiao<sup>a,b</sup>, Shanliang Yuan<sup>a</sup>, Biao Zhang<sup>a,\*</sup>,  
Honglin Chen<sup>a</sup>, Yi Jiang<sup>a,\*</sup>*

<sup>a</sup> National Engineering Laboratory for VOCs Pollution Control Material & Technology, Chengdu  
Institute of Organic Chemistry, Chinese Academy of Science, Chengdu, 610041, Sichuan, China.

<sup>b</sup> University of Chinese Academy of Science, Beijing, 100049, China.

Corresponding author.

Email address: yjiangcioc@163.com (Yi Jiang); zhangbiao07@139.com (Biao Zhang).

### Figure captions

**Fig. S1** - The effect of TiO<sub>2</sub> content on (a) methanol conversion, (b) H<sub>2</sub> time-space yield and CO selectivity for fresh CZAT-x catalysts.

**Fig. S2** - The comparison of methanol conversion between catalysts before and after thermal treatment.

**Table S1** - Information on the composition of catalysts.

**Table S2** - H<sub>2</sub>-TPR parameters for catalysts.

**Table S3** - Methanol conversion before and after thermal treatment.

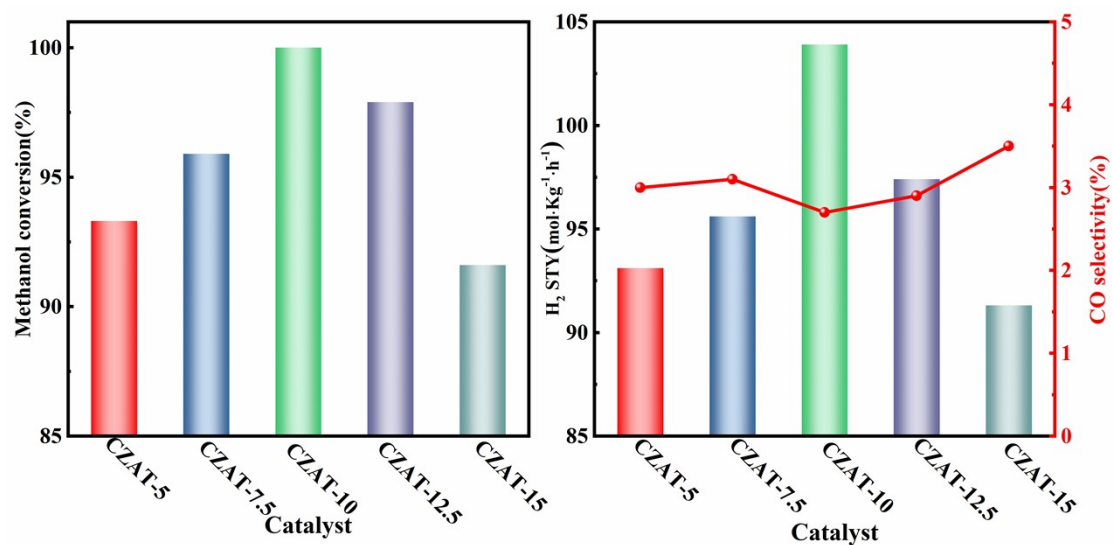

**Fig. S1** - The effect of TiO<sub>2</sub> content on (a) methanol conversion, (b) H<sub>2</sub> time-space yield and CO selectivity for fresh CZAT-x catalysts.

Reaction conditions: 493 K, H<sub>2</sub>O/CH<sub>3</sub>OH= 1.2, WHSV<sub>total</sub> = 2 h<sup>-1</sup>

From the experimental results, we can find that the activity of the catalyst shows a volcanic trend with the increase of TiO<sub>2</sub> content, in which CZAT-10 has the best catalytic activity. Therefore, the optimum TiO<sub>2</sub> incorporation in this work was found to be 10 w% of the total CZA catalyst.

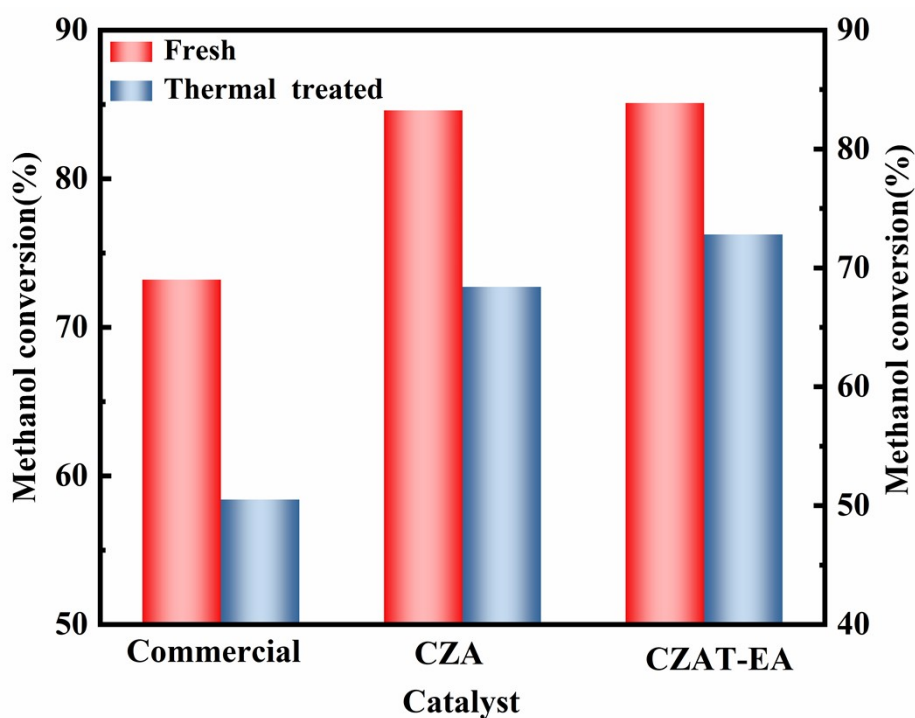

**Fig. S2** -The comparison of methanol conversion between catalysts before and after thermal treatment.

Reaction conditions: 473 K,  $\text{H}_2\text{O}/\text{CH}_3\text{OH} = 1.2$ ,  $\text{WHSV}_{\text{total}} = 2 \text{ h}^{-1}$ ; thermal treatment conditions: 723 K,  $\text{H}_2\text{O}/\text{CH}_3\text{OH} = 1.2$ ,  $\text{WHSV}_{\text{total}} = 2 \text{ h}^{-1}$ , 10 h.

**Table S1** - Information on the composition of catalysts.

| Catalysts | Mass fraction(%)           |      |                                |                  |                                    |      |                                |                  |
|-----------|----------------------------|------|--------------------------------|------------------|------------------------------------|------|--------------------------------|------------------|
|           | Theoretical composition(%) |      |                                |                  | Actual composition(%) <sup>a</sup> |      |                                |                  |
|           | CuO                        | ZnO  | Al <sub>2</sub> O <sub>3</sub> | TiO <sub>2</sub> | CuO                                | ZnO  | Al <sub>2</sub> O <sub>3</sub> | TiO <sub>2</sub> |
| CZA       | 65.0                       | 22.0 | 13.0                           | -                | 64.8                               | 21.7 | 13.5                           | -                |
| CZAT-S    | 59.1                       | 20.0 | 11.8                           | 9.1              | 58.2                               | 19.0 | 12.9                           | 9.9              |
| CZAT-D    | 59.1                       | 20.0 | 11.8                           | 9.1              | 57.8                               | 18.9 | 12.9                           | 10.4             |
| CZAT-EA   | 59.1                       | 20.0 | 11.8                           | 9.1              | 58.6                               | 19.0 | 12.6                           | 9.8              |

<sup>a</sup>: Determined by XRF.  $m_{(\text{Theoretical content of TiO}_2)} = m_{(\text{CuO} + \text{ZnO} + \text{Al}_2\text{O}_3)} \times 10\%$

The information of the chemical composition of CZAT-x catalysts, including the theoretical design values and the actual values obtained by XRF analysis, is listed in Table S1. The results of the XRF tests showed that the CuO, ZnO, Al<sub>2</sub>O<sub>3</sub> and TiO<sub>2</sub> were very close to the theoretical design values. Minor differences in the values may come from mass loss during the preparation process and measurement errors.

**Table S2** - H<sub>2</sub>-TPR parameters for catalysts.

| Sample  | Temperature(°C) |         | H <sub>2</sub> consumption(mmol/g) |         |       |
|---------|-----------------|---------|------------------------------------|---------|-------|
|         | $\alpha$        | $\beta$ | $\alpha$                           | $\beta$ | Total |
| CZA     | 230             | 254     | 3.10                               | 4.98    | 8.08  |
| CZAT-S  | 226             | 251     | 2.10                               | 4.23    | 6.34  |
| CZAT-D  | 223             | 250     | 1.98                               | 4.35    | 6.33  |
| CZAT-EA | 212             | 239     | 1.85                               | 4.61    | 6.46  |

As shown in Table S2, the hydrogen consumption of the catalysts followed the following order: CZA > CZAT-EA > CZAT-S  $\approx$  CZAT-D. Among them, the CZA catalyst possessed the highest hydrogen consumption of 8.08 mmol/g, which indicated that it possessed more reducible oxygen species, which could be attributed to the higher CuO content of the CZA catalyst. The hydrogen consumption of the catalysts was positively correlated with the activity of the catalysts except for the CZA catalyst, in which the CZAT-EA had a higher hydrogen consumption, and its activity was better. The above results indicate that the TiO<sub>2</sub> effect is greater than the effect of CuO content when TiO<sub>2</sub> is introduced into in this system.

**Table S3** - Methanol conversion before and after thermal treatment.

| Catalysts | Fresh                 | Thermal treated       | activity loss<br>rates(%) |
|-----------|-----------------------|-----------------------|---------------------------|
|           | X <sub>MeOH</sub> (%) | X <sub>MeOH</sub> (%) |                           |
| CZA       | 94.8                  | 89.7                  | 5.37                      |
| CZ        | 92.5                  | 74.3                  | 19.68                     |

thermal treatment conditions: 723 K, H<sub>2</sub>O/CH<sub>3</sub>OH= 1.2, WHSV<sub>total</sub> = 2 h<sup>-1</sup>, 10 h.  
 reaction conditions: 493 K, H<sub>2</sub>O/CH<sub>3</sub>OH= 1.2, WHSV<sub>total</sub> = 2 h<sup>-1</sup>.

In our study, the focus was primarily on the influence of TiO<sub>2</sub> in a series of TiO<sub>2</sub>-doped modified CZAT catalysts. In the corresponding characterizations, the absence of observable changes in aluminum-containing substances prevents us from directly concluding the role of Al<sub>2</sub>O<sub>3</sub> in the CZAT system, while also acknowledging its potential impact.

To gain deeper insights into the influence of Al<sub>2</sub>O<sub>3</sub>, we conducted supplementary

experiments. In particular, we synthesized CZA and CZ catalysts and assessed their thermal stability by comparing methanol conversion before and after heat treatment under identical conditions (Table S3). The outcomes reveal that the CZA catalyst demonstrated notable thermal stability, exhibiting a lower rate of activity loss in comparison to the CZ catalyst.

The above results further indicate that  $\text{Al}_2\text{O}_3$  plays an important role in improving the stability of the catalyst. This is consistent with the fact that in the  $\text{Cu/ZnO/Al}_2\text{O}_3$  catalysts reported in the literature,  $\text{Al}_2\text{O}_3$  is usually regarded as a structural additive due to its large specific surface area, and its presence can effectively inhibit the thermal sintering of the Cu particles during the reaction process, thus improving the stability of the catalytic materials<sup>[1, 2]</sup>.

## References

- [1] Yang X, Meng Q, Ding G, et al. Construction of novel Cu/ZnO-Al<sub>2</sub>O<sub>3</sub> composites for furfural hydrogenation: The role of Al components [J]. *Applied Catalysis A: General*, 2018, 561: 78-86.
- [2] Behrens M, Zander S, Kurr P, et al. Performance Improvement of Nanocatalysts by Promoter-Induced Defects in the Support Material: Methanol Synthesis over Cu/ZnO:Al [J]. *Journal of the American Chemical Society*, 2013, 135(16): 6061-6068.
